# Supplementary material
Source: ML conference proceedings conference paper supplement (https://openreview.net/forum?id=7vzDBvviRO)
Supplement: supplementary_material [file attachment]

# Supplementary Materials for UBSOFT: A Simulation Platform for Robotic Skill Learning in Unbounded Soft Environments

Anonymous Author(s)

Affiliation

Address

email

## 1 A Implementation Details on the UBSOFTEngine

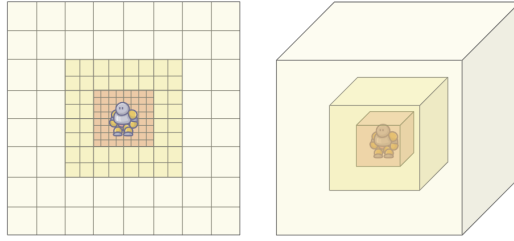

Figure 1: Hierarchical Grids for Spatially Adaptive Scheme.

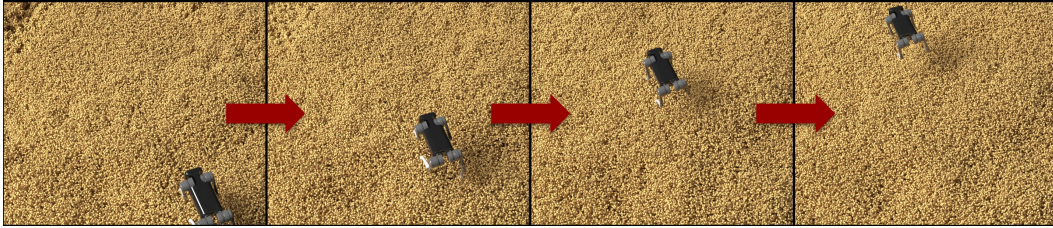

Figure 2: A robot dog walks in a desert with dunes.

### 2 A.1 Spatial Adaptive Scheme

3 To improve the efficiency of our proposed algorithm, we implement a dynamic data structure based  
4 on tagging and amortized restructuring to support the deletion and addition of particles during the  
5 resampling process.

6 The hierarchical grid system introduced in section 3.2 is illustrated in Figure 1. Centering on the  
7 robot's position, grids of varying granularity are nested, enabling spatial discretization to varying  
8 degrees based on the robot's position. Unlike traditional MPM, which applies a uniform granularity  
9 across the entire spatial domain, our hierarchical grid *adapts* dynamically according to the distance to  
10 the agent.

11 With the proposed spatial adaptive scheme, UBSOFT is able to efficiently simulate large-scale  
12 scenes filled with soft materials, enabling real-time and long-horizon robot learning in *unbounded*  
13 environments, such as a robot dog walking on a desert in Figure 2.

## 14 B UBSOFT Tasks and Evaluation Details

### 15 B.1 Task Details

16 In RL algorithms, we employ stratified sampling and downsampling from all particles to construct  
17 the observation input.

18 In all manipulation tasks, we utilize a simulation step of 2e-4 seconds, and we establish a maximum  
19 action range specific to each task to ensure system stability. In locomotion tasks, the simulation step  
20 is 2e-3 seconds composed of 10 sub-steps for easier control policy learning. All tasks run faster than  
21 real time (more than 60 FPS where each frame is a simulation step) on a laptop computer equipped  
22 with an Nvidia RTX 4090 GPU and an Intel i9 CPU.

### 23 B.2 Reward Design

24 In each task, the reward is defined as  $\mathcal{R} = -\alpha\mathcal{L} + \beta$ , where  $L$  is the total loss of the entire episode,  
25  $\alpha$  and  $\beta$  are task-specific constant for reward scaling.

26 **Sand Painting.** We use the state of particles in the ground-truth policy as the target state, compute  
27 the chamfer distance  $d_t$  between the current state and the target state at each time step, and sum them  
28 up as the total loss,  $\mathcal{L} = \sum_t d_t$ .

29 **Scoop Out.** This task has two phases, inserting the shovel into the sand and then lifting the shovel  
30 to scoop out the duck. We found that simple matching with goal patterns is hard to learn and not  
31 robust enough. Therefore, we divided the learning process into two stages as well. In the first stage,  
32 the goal is to encourage the shovel to approach a position under the duck, thus  $l_1 = \|p_{shovel} - p_t\|$ ,  
33 where  $p_t$  is dynamically computed as  $p_t = p_{duck} - (0, 0, 0.03)$ . In the second stage, the goal is to  
34 encourage the shovel to lift and scoop out the duck, thus  $l_2 = -z_{shovel} + n_{d,t}$ , where  $n_{d,t}$  is the  
35 number of particles within 0.1m around the duck at time step  $i$ . Finally, total loss is computed as  
36  $\mathcal{L} = \sum_t (\sigma_t \cdot l_1 + (1 - \sigma_t) \cdot l_2)$ , where  $\sigma_t$  indicates whether step  $t$  is in the first stage.

37 **Dig A Hole.** Similar to the Scoop Out task, this task also consists of two stages. In the first stage, the  
38 loss function  $l_1 = |z_{shovel} - z_p|$  encourages the shovel to descend, where  $z_p$  is the z-coordinate of a  
39 predefined point below the sand surface. In the second stage, the loss function  $l_2 = -(z_{shovel} - z_p)$   
40 encourages the shovel to ascend. The final total loss is computed the same way as in Scoop Out,  
41  $\mathcal{L} = \sum_t (\sigma_t \cdot l_1 + (1 - \sigma_t) \cdot l_2)$ , where  $\sigma_t$  indicates whether step  $t$  is in the first stage.

42 **Smooth Surface.** In this task, we use the number of particles above a predefined threshold as the  
43 metric. Specifically, the loss is defined as  $\mathcal{L} = \sum_{t>1} (n_{s,t} - n_{s,t-1})$ , where  $n_{s,t}$  is the number of  
44 particles above the average sand surface height.

45 **Quadruped Walk.** At each step, we compute the distance  $d_t$  between the current state and the target  
46 state, represented by the pelvis joint state. The target state is defined as the robot's state that maintains  
47 a forward velocity close to 1 m/s. The total loss  $\mathcal{L} = \sum_t d_t$  is the sum of these distances.

48 **Humanoid Stand.** To maintain the humanoid robot in a standing pose, we compute the delta height  
49 between the current state and the initial state, represented by the pelvis joint state  $d_{p,t}$  and the head  
50 joint state  $d_{h,t}$ . The total loss  $\mathcal{L} = \sum_t (d_{p,t} + d_{h,t})$  is the sum of these delta heights.

51 **Humanoid Walk.** The target state is defined as the humanoid robot's state that maintains a forward  
52 velocity close to 1m/s without falling to the ground. At each step, we compute the distance  $d_t$  between  
53 the current and the target pelvis state, reflecting the forward velocity. Additionally, we compute the  
54 delta head joint height  $d_{h,t}$ , representing the standing pose. The total loss  $\mathcal{L} = \sum_t (d_t + d_{h,t})$  is the  
55 sum of the forward distances and the delta heights.

| Task   | Quadruped Sand Walk | Humanoid Snow Stand | Humanoid Snow Walk |
|--------|---------------------|---------------------|--------------------|
| PPO    | 862.8±94.8          | 528.3±32.1          | 518.8±32.7         |
| SAC    | <b>1572.8±245.5</b> | 553.1±34.7          | 475.3±34.8         |
| CMA-ES | 1037.9±123.3        | <b>717.7±47.7</b>   | <b>524.5±19.3</b>  |

  

| Task   | Quadruped Snow Walk | Humanoid Snow Stand | Humanoid Snow Walk |
|--------|---------------------|---------------------|--------------------|
| PPO    | <b>2387.4±336.7</b> | 507.0±12.0          | 460.2±21.4         |
| SAC    | 1225.0±201.8        | <b>753.3±61.3</b>   | 530.9±37.2         |
| CMA-ES | 1160.6±95.9         | 716.6±39.9          | <b>554.1±30.6</b>  |

  

| Task   | Quadruped Elastic Walk | Humanoid Elastic Stand | Humanoid Elastic Walk |
|--------|------------------------|------------------------|-----------------------|
| PPO    | <b>2387.4±514.6</b>    | 555.7±36.6             | 485.1±32.2            |
| SAC    | 1214.6±276.6           | 653.4±51.2             | 579.7±37.3            |
| CMA-ES | 1224.4±156.5           | <b>686.2±31.9</b>      | <b>648.8±40.4</b>     |

Table 1: The final accumulated reward and the standard deviation for each method.

## 56 C Additional Experiments Results

### 57 C.1 Locomotion Task Results on More Materials

58 To further investigate our environment, we conduct experiments with locomotion tasks on more  
59 materials, including sand particles, snow particles, and elastic particles. The results are presented  
60 in Table 1 and Figure 3. Similar to the results reported in the main paper, reinforcement learning  
61 algorithms generally struggle with these tasks. In particular, PPO generally fails on humanoid standing  
62 tasks across all surfaces. On the other hand, the sampling-based trajectory optimization algorithm,  
63 represented by CMA-ES, typically achieves better performance. This pattern is further amplified  
64 by the large and complex state and action spaces associated with locomotion tasks. Additionally,  
65 maintaining a specified pose or moving forward consistently remains challenging for end-to-end  
66 training, especially on diverse rough surfaces. Consequently, developing an improved policy for  
67 locomotion tasks remains a significant challenge.

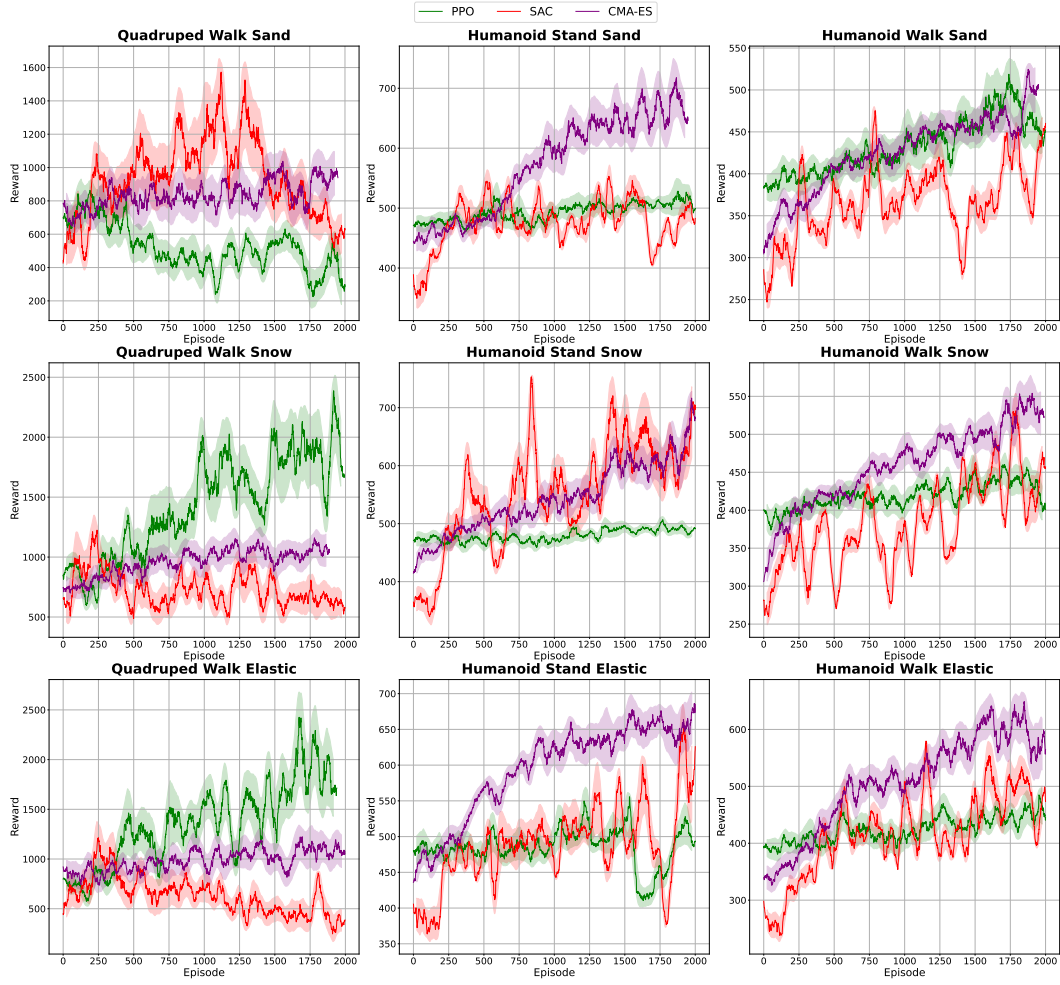

Figure 3: Reward curves for all methods on locomotion tasks, including PPO, SAC, and CMA-ES.
